## Impact of the cardio-hepatic syndrome on outcomes after transcatheter mitral valve edge-to-edge repair

L. Stolz<sup>1</sup>, M. Orban<sup>1</sup>, N. Karam<sup>2</sup>, E. Lubos<sup>3</sup>, M. Wild<sup>4</sup>, F. Praz<sup>4</sup>, D. Braun<sup>1</sup>, P. Doldi<sup>1</sup>, N. Tence<sup>2</sup>, C. Hagl<sup>5</sup>, J. Mayerle<sup>6</sup>, M. Naebauer<sup>1</sup>, D. Kalbacher<sup>3</sup>, S. Massberg<sup>1</sup>, J. Hausleiter<sup>1</sup>

<sup>1</sup>Clinic of the University of Munich Großhadern, Medizinische Klinik und Poliklinik I, Munich, Germany; <sup>2</sup>European Hospital Georges Pompidou, Paris, France; <sup>3</sup>The University Medical Center Hamburg-Eppendorf, Hamburg, Germany; <sup>4</sup>Inselspital - University of Bern, Bern, Switzerland; <sup>5</sup>Clinic of the University of Munich Großhadern, Herzchirurgische Klinik und Poliklinik, Munich, Germany; <sup>6</sup>Clinic of the University of Munich Großhadern, Medizinische Klinik und Poliklinik II, Munich, Germany

**Funding Acknowledgement:** Type of funding sources: None.

**Background:** The prognostic value of impaired liver function in the presence of moderate-to-severe and severe mitral regurgitation (MR), also called cardio-hepatic syndrome (CHS), for outcomes in patients undergoing transcatheter edge-to-edge repair (TEER) has not been studied yet.

**Purpose:** In this work, we aimed at identifying the prognostic impact of the CHS on two-year mortality in patients undergoing TEER compared to established risk factors. Furthermore, we evaluated the change in hepatic function after TEER.

**Methods:** Hepatic function was assessed by laboratory parameters of liver function (bilirubin, gamma glutamyl transferase [GGT], alkaline phosphatase [AP], aspartate and alanine aminotransferase [AST and ALT]). We defined CHS as elevation of at least two out of three laboratory parameters of hepatic cholestasis (bilirubin, GGT, AP). The impact of CHS on two-year mortality was evaluated using a proportional hazards Cox model. The change in hepatic function after TEER was evaluated by repeat laboratory testing at follow-up.

**Results:** We included 1083 patients who underwent TEER for highly symptomatic primary or secondary MR at four high volume academic European centers between 2008 and 2019. In 66.4% of patients, we observed elevated levels of either bilirubin, GGT or AP. CHS was present in 23% of patients and showed strong association with a reduced two-year survival (52.9% vs. 87.0% in patients without CHS,  $p < 0.01$ ). In a multivariate Cox regression model, CHS was identified as a strong and independent predictor of increased two-year mortality (hazard ratio 1.49,  $p = 0.03$ ). In patients with successful MR reduction  $\leq 2+$  (90.7% of patients), parameters of hepatic function significantly improved from baseline to follow-up ( $-0.2$  mg/dl for bilirubin;  $-21$  U/l for GGT, respectively,  $p < 0.01$ ), while they did not in case of residual postprocedural MR  $> 2+$ .

**Conclusions:** CHS can be observed in up to 25% of patients undergoing TEER and is associated with impaired two-year survival rates. Successful TEER is associated with decreased levels of hepatic enzymes at follow-up evaluation.

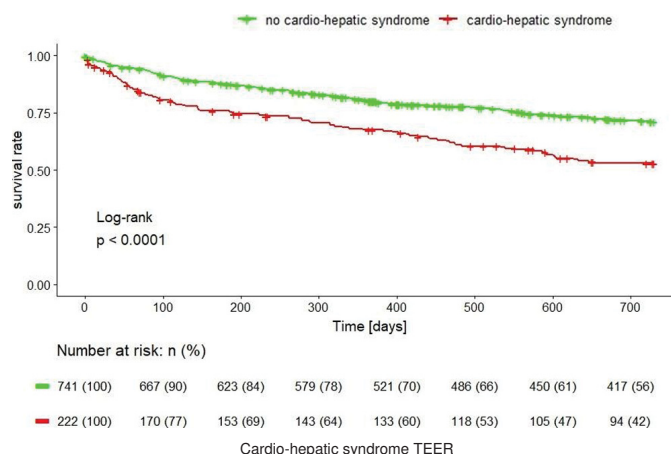

Source: http://academic.oup.com/eurheartj/article-pdf/42/Supplement_1/ehab724.2217/40596758/ehab724.2217.pdf
